# Supplementary material for: Boundary curves of individual items in the distribution of total depressive symptom scores approximate an exponential pattern in a general population
Source: PeerJ. 2016 Oct 11;4:e2566. doi: 10.7717/peerj.2566 (PMC5068372; doi:10.7717/peerj.2566)
Supplement: Supplemental Information 8 [file peerj-04-2566-s008.xlsx]

## Sheet: fig1,A,D
tota score	0	0,1	0,1,2	all
0	2920	2920	2920	2920
1	1768	2087	2087	2087
2	1303	1727	1746	1746
3	1071	1598	1625	1629
4	777	1323	1358	1361
5	610	1203	1264	1270
6	534	1129	1204	1207
7	352	888	972	976
8	281	768	856	864
9	246	727	817	828
10	209	631	732	743
11	146	519	624	634
12	123	440	544	560
13	107	421	529	545
14	64	337	458	475
15	74	276	391	401
16	35	273	379	406
17	41	199	315	339
18	37	174	279	302
19	23	125	216	239
20	24	120	192	211
21	18	84	159	188
22	12	71	132	154
23	9	60	121	144
24	9	47	96	116
25	5	40	70	83
26	6	35	74	99
27	4	16	55	78
28	3	18	46	68
29	1	9	29	40
30	4	13	29	56
31	3	10	24	43
32	1	10	29	44
33	1	4	11	30
34	1	5	13	23
35	1	4	8	25
36	0	0	12	21
37	0	1	1	10
38	0	1	5	11
39	0	0	4	12
40	0	0	1	11
41	0	1	2	10
42	0	0	1	8
43	0	0	0	4
44	0	0	1	7
45	1	1	2	3
46	0	1	1	4
47	0	0	0	2
48	0	0	0	3

## Sheet: fig1B,E
total score	0	0,1	0,1,2	total
0	2920	2920	2920	2920
1	1887	2087	2087	2087
2	1520	1721	1746	1746
3	1391	1596	1627	1629
4	1071	1324	1357	1361
5	972	1228	1266	1270
6	869	1147	1196	1207
7	646	920	969	976
8	569	816	855	864
9	505	760	822	828
10	434	670	740	743
11	340	567	631	634
12	296	478	548	560
13	290	465	533	545
14	224	390	457	475
15	179	320	388	401
16	151	331	394	406
17	120	256	326	339
18	112	236	290	302
19	90	169	225	239
20	65	138	201	211
21	60	135	178	188
22	42	101	146	154
23	38	99	134	144
24	33	77	105	116
25	19	50	74	83
26	26	63	90	99
27	23	46	72	78
28	20	41	58	68
29	9	20	34	40
30	16	31	50	56
31	8	23	36	43
32	5	11	34	44
33	3	12	21	30
34	3	13	18	23
35	3	7	19	25
36	4	8	13	21
37	1	2	7	10
38	2	3	8	11
39	1	2	6	12
40	3	4	8	11
41	1	2	6	10
42	0	2	4	8
43	1	2	3	4
44	2	3	4	7
45	0	0	1	3
46	0	0	1	4
47	0	0	0	2
48	0	0	0	3

## Sheet: fig1C,F
total scores	0	0,1	0,1,2	0,1,2,3
0	2920	2920	2920	2920
1	2053	2087	2087	2087
2	1689	1744	1746	1746
3	1536	1618	1624	1629
4	1239	1351	1357	1361
5	1085	1249	1264	1270
6	947	1189	1200	1207
7	705	955	971	976
8	563	834	860	864
9	512	784	822	828
10	405	694	734	743
11	288	568	625	634
12	236	492	548	560
13	203	480	531	545
14	145	394	457	475
15	99	316	379	401
16	97	327	391	406
17	76	236	318	339
18	57	191	280	302
19	36	130	206	239
20	49	146	190	211
21	29	104	166	188
22	25	76	130	154
23	9	66	128	144
24	9	60	102	116
25	9	34	62	83
26	19	45	76	99
27	7	26	57	78
28	3	23	41	68
29	2	11	28	40
30	4	13	35	56
31	1	8	22	43
32	1	5	28	44
33	0	2	13	30
34	0	5	13	23
35	1	2	10	25
36	2	2	7	21
37	0	0	1	10
38	2	2	6	11
39	0	1	3	12
40	0	0	2	11
41	0	0	1	10
42	0	0	2	8
43	0	1	1	4
44	0	0	2	7
45	0	1	1	3
46	0	0	0	4
47	0	0	1	2
48	0	0	0	3
	0

## Sheet: Fig2A,D
total score	boundary	total
0	2920	2920
1	1568	2087
2	1132	1746
3	911	1629
4	616	1361
5	459	1270
6	380	1207
7	240	976
8	194	864
9	157	828
10	138	743
11	88	634
12	67	560
13	62	545
14	39	475
15	38	401
16	19	406
17	21	339
18	15	302
19	12	239
20	8	211
21	9	188
22	9	154
23	4	144
24	4	116
25	0	83
26	1	99
27	2	78
28	1	68
29	1	40
30	2	56
31	1	43
32	0	44
33	0	30
34	0	23
35	0	25
36	0	21
37	0	10
38	0	11
39	0	12
40	0	11
41	0	10
42	0	8
43	0	4
44	0	7
45	0	3
46	0	4
47	0	2
48	0	3
次の級	0

## Sheet: fig2B,E
total score	boundary	total
0	2920	2920
1	1381	2087
2	864	1746
3	549	1629
4	312	1361
5	169	1270
6	126	1207
7	62	976
8	38	864
9	31	828
10	30	743
11	12	634
12	14	560
13	4	545
14	3	475
15	5	401
16	4	406
17	3	339
18	2	302
19	0	239
20	0	211
21	1	188
22	0	154
23	0	144
24	0	116
25	0	83
26	0	99
27	0	78
28	0	68
29	0	40
30	0	56
31	0	43
32	0	44
33	0	30
34	0	23
35	0	25
36	0	21
37	0	10
38	0	11
39	0	12
40	0	11
41	0	10
42	0	8
43	0	4
44	0	7
45	0	3
46	0	4
47	0	2
48	0	3
次の級	0

## Sheet: fig2C,F
total scores	boundary	total
0	2920	2920
1	1005	2087
2	494	1746
3	283	1629
4	117	1361
5	51	1270
6	48	1207
7	14	976
8	4	864
9	9	828
10	3	743
11	1	634
12	3	560
13	2	545
14	1	475
15	0	401
16	2	406
17	0	339
18	0	302
19	0	239
20	0	211
21	0	188
22	0	154
23	0	144
24	0	116
25	0	83
26	0	99
27	0	78
28	0	68
29	0	40
30	0	56
31	0	43
32	0	44
33	0	30
34	0	23
35	0	25
36	0	21
37	0	10
38	0	11
39	0	12
40	0	11
41	0	10
42	0	8
43	0	4
44	0	7
45	0	3
46	0	4
47	0	2
48	0	3
次の級	0

## Sheet: fig3,A,C
total score	boundary	total
0	1285	1285
1	781	894
2	770	920
3	1884	2148
4	1382	1854
5	1073	1651
6	815	1473
7	625	1258
8	453	1120
9	376	1027
10	269	826
11	236	762
12	176	712
13	140	615
14	105	512
15	106	530
16	66	444
17	48	389
18	42	385
19	34	320
20	38	271
21	22	217
22	17	193
23	20	185
24	13	154
25	9	132
26	8	104
27	5	89
28	6	84
29	4	75
30	3	59
31	1	51
32	1	35
33	4	60
34	4	34
35	0	26
36	1	21
37	0	22
38	1	16
39	0	19
40	0	11
41	0	12
42	0	8
43	0	9
44	0	3
45	1	9
46	0	3
47	0	6
48	0	2
49	0	2
50	0	1
51	0	2
次の級	0	0

## Sheet: fig3,B,D
total scores	boundary	total
0	1285	1285
1	679	894
2	548	920
3	544	2148
4	446	1854
5	389	1651
6	389	1473
7	306	1258
8	254	1120
9	251	1027
10	180	826
11	175	762
12	159	712
13	116	615
14	98	512
15	101	530
16	76	444
17	65	389
18	66	385
19	62	320
20	36	271
21	38	217
22	27	193
23	31	185
24	17	154
25	15	132
26	16	104
27	17	89
28	14	84
29	7	75
30	16	59
31	8	51
32	8	35
33	8	60
34	7	34
35	8	26
36	3	21
37	2	22
38	2	16
39	5	19
40	4	11
41	4	12
42	2	8
43	2	9
44	0	3
45	1	9
46	0	3
47	1	6
48	1	2
49	0	2
50	0	1
51	0	2
次の級	0	0

## Sheet: sup,fig1A,D
total scores	0	0,1	0,1,2	total
0	2920	2920	2920	2920
1	1934	2087	2087	2087
2	1444	1729	1746	1746
3	1095	1581	1609	1629
4	817	1288	1346	1361
5	599	1187	1261	1270
6	496	1082	1191	1207
7	321	859	959	976
8	251	732	841	864
9	214	646	807	828
10	139	579	714	743
11	117	482	606	634
12	103	402	538	560
13	75	379	522	545
14	66	314	452	475
15	58	242	378	401
16	42	260	372	406
17	43	202	314	339
18	26	167	268	302
19	13	104	213	239
20	23	102	179	211
21	10	73	160	188
22	11	56	122	154
23	11	57	120	144
24	6	28	91	116
25	5	22	61	83
26	7	23	72	99
27	4	18	49	78
28	4	19	51	68
29	3	10	23	40
30	3	10	29	56
31	3	7	21	43
32	2	7	29	44
33	2	7	16	30
34	1	2	13	23
35	1	2	11	25
36	0	2	7	21
37	0	0	2	10
38	0	2	4	11
39	0	1	2	12
40	0	0	3	11
41	0	0	2	10
42	0	0	0	8
43	0	0	1	4
44	0	0	0	7
45	0	0	0	3
46	0	0	0	4
47	0	0	0	2
48	0	0	0	3
	0

## Sheet: sup.fig1B,E
total scores	0	0,1	0,1,2	0,1,2,3
0	2920	2920	2920	2920
1	2017	2087	2087	2087
2	1559	1742	1746	1746
3	1317	1617	1625	1629
4	922	1339	1359	1361
5	727	1224	1265	1270
6	532	1146	1199	1207
7	369	895	961	976
8	261	776	854	864
9	200	682	803	828
10	140	579	721	743
11	102	484	611	634
12	94	412	528	560
13	51	365	516	545
14	39	293	435	475
15	28	215	362	401
16	22	210	351	406
17	15	162	290	339
18	20	127	250	302
19	9	78	191	239
20	11	70	159	211
21	6	53	131	188
22	7	33	108	154
23	4	33	96	144
24	0	20	68	116
25	1	4	41	83
26	3	11	50	99
27	2	5	31	78
28	2	7	27	68
29	1	3	15	40
30	0	2	9	56
31	0	1	13	43
32	2	4	22	44
33	0	0	6	30
34	0	0	2	23
35	0	0	3	25
36	1	1	5	21
37	0	0	1	10
38	0	0	0	11
39	0	0	1	12
40	0	0	1	11
41	0	0	2	10
42	0	0	0	8
43	0	0	0	4
44	0	0	0	7
45	0	0	0	3
46	0	0	0	4
47	0	0	0	2
48	0	0	0	3

[truncated: 14 more sheets: sup,fig1C,F, sup.fig2A,D, sup.fig2B,E, sup.fig2C,F, sup.fig3A,D, sup.fig3B,E, supfig3C,F, sup,fig4A,D, sup.fig4B,E, sup.fig4C,F, sup.fig5A,B, supfig6A,D, sup,fig6B,E, sup.fig6C,F]
